# Supplementary material
Source: PubMed Central journal article supplement (PMC7841577)
Supplement: jamasurg-e206361-s003.pdf [file jamasurg-e206361-s003.pdf]

Strömblad. Effect of a predictive model on planned surgical duration accuracy, patient wait time, and use of presurgical resources: a randomized clinical trial. *JAMA Surg*. Published online January 27, 2021. doi:10.1001/jamasurg.2020.6361

## **Data Sharing Statement**

### **Data**

**Data available:** No
